# Supplementary material for: Validating free spectral range tracking as a robust method for mitigating artifacts in VSC kinetics
Source: Royal Society of Chemistry journal article supplement (doi:10.1039/d6ra01794k), 2026-05-18
Supplement: d6ra01794k1.pdf [file d6ra01794k1.pdf]

## Supporting Information

### Validating Free Spectral Range Tracking as a Robust Method for Mitigating Artifacts in VSC Kinetics

Kaihao Gu<sup>1,†</sup>, Xinmin Zhao<sup>1,†</sup>, Runling Peng<sup>1,\*</sup>, Feng Zhang<sup>1,2,\*</sup>

<sup>1</sup>Terahertz Technology Innovation Research Institute, Terahertz Spectrum and Imaging Technology Cooperative Innovation Center, Shanghai Key Lab of Modern Optical System, School of Optical-Electrical and Computer Engineering, University of Shanghai for Science and Technology, Shanghai 200093, China.

<sup>2</sup>Zhejiang Key Laboratory of Soft Matter Biomedical Materials, Wenzhou Institute, University of Chinese Academy of Sciences, Wenzhou, Zhejiang 325000, China.

†These authors contributed equally to this work.

\*Corresponding authors

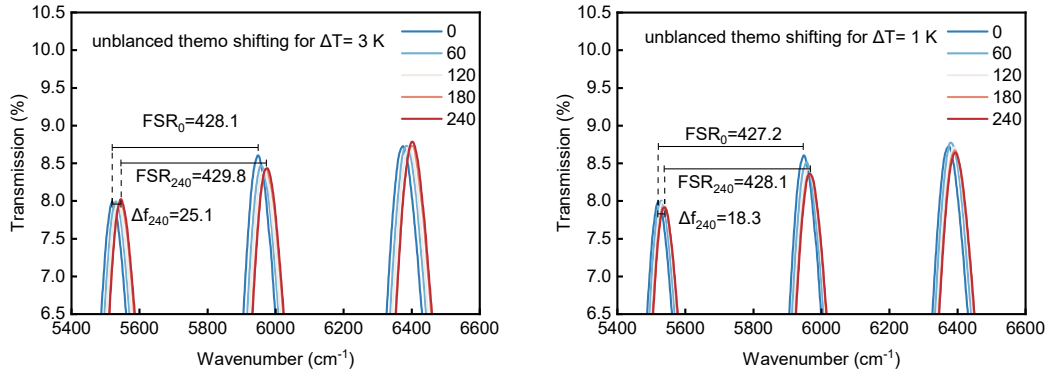

**Fig. S1** Thermal relaxation-induced frequency drift of the  $m = 10$  cavity mode under nonequilibrium conditions with  $\Delta T = 3, 1$  K, monitored over 240 min.

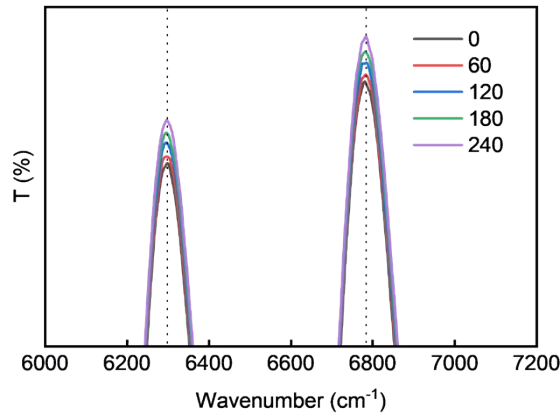

**Fig. S2** The cavity filled with air over 240 min after reaching thermal equilibrium.

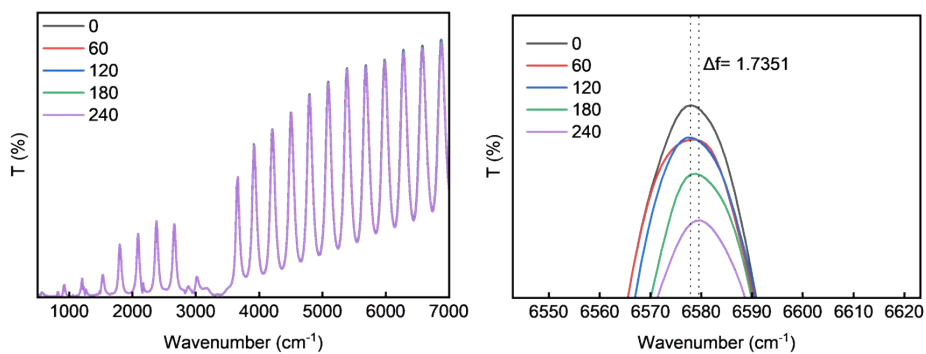

**Fig. S3** The cavity filled with 3 M PTA over 240 min after reaching thermal equilibrium.

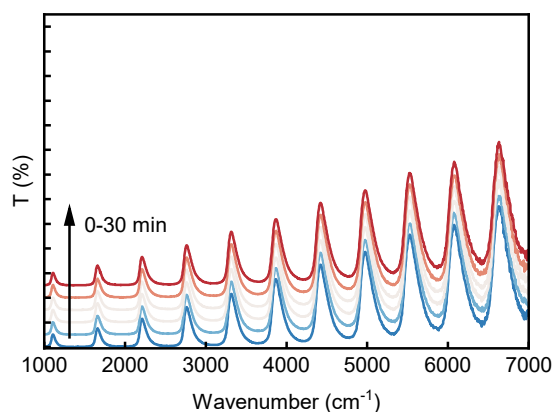

**Fig. S4** Equilibrium of the cavity after pressure and thermal stabilization over 30 min (The timescale required for the reaction).

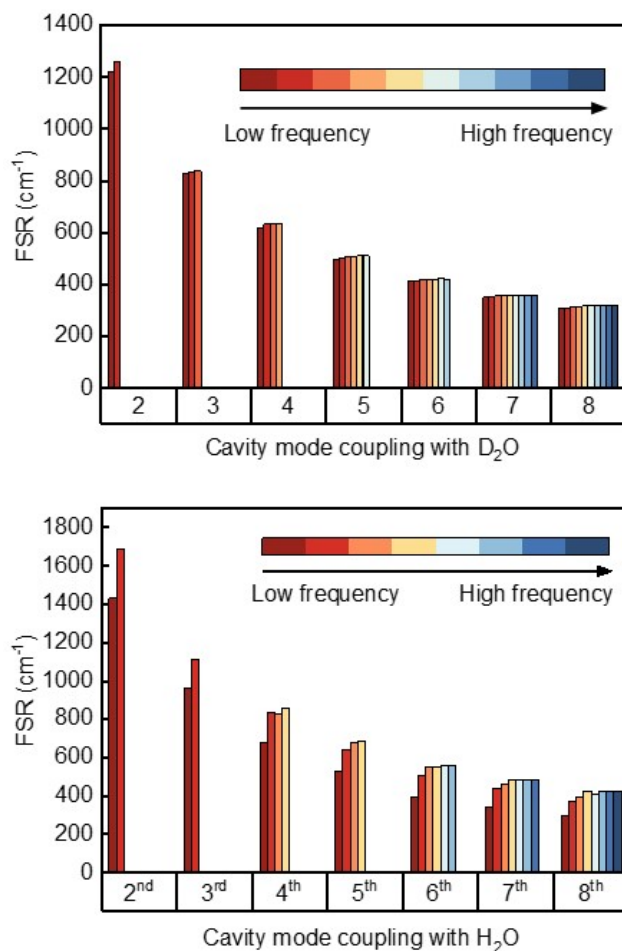

**Fig. S5** Apparent refractive index changes of D<sub>2</sub>O/H<sub>2</sub>O stretching vibrations coupled with the 1st to 8th Fabry-Pérot (FP) cavity modes, extracted via  $\Delta$ FSR. Different colors indicate apparent refractive indices extracted from the high-frequency region above 5000 cm<sup>-1</sup> for each coupling

order. In the bar chart, the color gradient from red to blue represents resonance peaks from low to high frequency.

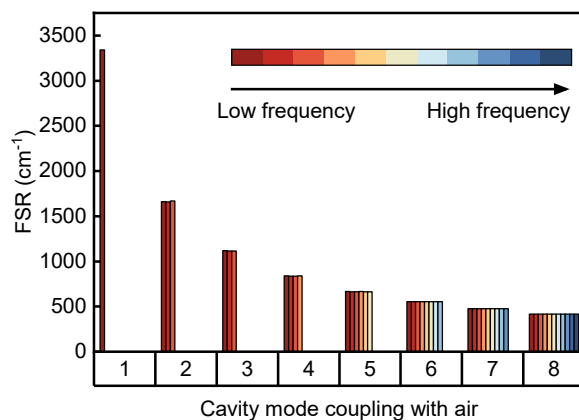

**Fig. S6** Estimated FSR of air-filled empty cavities for achieving O–H vibrational strong coupling in H<sub>2</sub>O-filled FP cavities. The FSR values correspond to the air-filled cavity states required before liquid injection, so that after filling the cavity with H<sub>2</sub>O, the O–H stretching vibration is expected to couple with the 1st to 8th FP cavity modes. Different colors denote different target cavity-mode orders. the color gradient from red to blue represents resonance peaks from low to high frequency.

**Table.S1** Drift analysis of the thermally equilibrated cavity over 240 min.

| Contained | Time (min) | Frequency f (cm <sup>-1</sup> ) | Frequency shifting Δf (cm <sup>-1</sup> ) |           |
|-----------|------------|---------------------------------|-------------------------------------------|-----------|
| Cavity 1  |            | 0                               | 6298.372                                  | /         |
|           | Air        | 60                              | 6298.5648                                 | 0.1928    |
|           |            | 120                             | 6298.372                                  | 0         |
|           |            | 180                             | 6298.7576                                 | 0.3856    |
|           |            | 240                             | 6298.7576                                 | 0.3856    |
|           |            | 0                               | 6578                                      | /         |
|           | PTA        | 60                              | 6579.1568                                 | 1.1567    |
|           |            | 120                             | 6579.5424                                 | 1.5423    |
|           |            | 180                             | 6579.5424                                 | 1.5423    |
|           |            | 240                             | 6579.7352                                 | 1.7351    |
| Cavity 2  |            |                                 | 0                                         | 6300.301  |
|           | Air        | 60                              | 6300.1082                                 | -0.1928   |
|           |            | 120                             | 6300.1082                                 | -0.1928   |
|           |            | 180                             | 6300.6866                                 | 0.3856    |
|           |            | 240                             | 6300.4938                                 | 0.1928    |
|           |            | 0                               | 6579.5424                                 | /         |
|           | PTA        | 60                              | 6580.892                                  | 1.3496    |
|           |            | 120                             | 6581.4704                                 | 1.928     |
|           |            | 180                             | 6581.6632                                 | 2.1208    |
|           |            | 240                             | 6581.6632                                 | 2.1208    |
| Cavity 3  |            |                                 | 0                                         | 6301.0722 |
|           | Air        | 60                              | 6301.265                                  | 0.1928    |
|           |            | 120                             | 6301.6506                                 | 0.5784    |
|           |            | 180                             | 6301.6506                                 | 0.5784    |
|           |            | 240                             | 6301.6506                                 | 0.5784    |
|           |            | 0                               | 6579.5424                                 | /         |
|           | PTA        | 60                              | 6580.5064                                 | 0.964     |
|           |            | 120                             | 6580.892                                  | 1.3496    |
|           |            | 180                             | 6581.4704                                 | 1.928     |
|           |            | 240                             | 6581.2776                                 | 1.7352    |
